# Supplementary material for: Whole-genome sequence of the oriental lung fluke Paragonimus westermani
Source: PubMed Central journal article supplement (PMC6329441; doi:10.1093/gigascience/giy146), 2018-12-06
Supplement: giy146_supplemental_file.pdf [file giy146_supplemental_file.pdf]

**Repeat1 (328bp ~8 copies)**

TGTCAAGTTTGAAGGGACCGATTTAGCTTCGATTCCAATGGGTGTAGAGGTTTGGAGTTGGC  
GTTGCCTGTTGATTTTCTGTGTCAAGGGGGTCTGAAACTATGCGCGAAAAGGGTGCAAAAA  
AAATTCGTAAGGGGGGGGCATTGCAAACTTTTCTTTTTTAAAAATTTACAGCTTAATTCAG  
GTCTAGTCGAAGAGTGAAGTGGTTTTATCTCCCCTTAATTTGACTGTGCGATTAATAATTTT  
CGTTACTTTTGTGTCAAATACATCATAGCTTTTTTTCAGGGGAGTTCGGAGGTGAAAAGTT  
GGATTTTTGAAGGGTTT

**Repeat2 (229bp ~13 copies)**

TGTCAAGTTTGAAGGGACCGATTTGGCTTCGATTCCAATGGGTGTAGAGGTTTGGAGTTGGC  
GTTGCCTGTTGATTTTCTGTGTCAAGGGGGTTTTAAACTATGCTGTGCGAGGGTGTTCACCG  
TAGCTTTTTTTCAGGGGAGTTCGGAGGTGAAAAGTTCGGTTTTTTTCGATGAGCTGGTACGAAA  
TGCTATTATGTTAATCATAAGTAGAGTTATAATTAGAGGTCTC

**Repeat3 (406bp 3 copies)**

AAAAAAGATATCATCGCTAAAAGAGAATAATTGGAAATGACTGTGTTGTCGTAAAGGATTG  
GGATTAAGTGTAGTCCGAGCAGTGTGGTTGTGCGAGGAAGAGATGAGGGGGGCTTAATAAT  
AATATGAGGAGGCCCTACAATGAAAGTGGTTAAGAAGGTCCATTGTAAAGGATTAGGATTA  
ACTGTAGTCCGAGCAGTGTGGTTGTGCGAGGAAGAGATGAGGGGGGCTTAATAATAATATG  
AGGAGGCCCTACAATGAAAGTGGTTAAGAAGGTCCATTGTAAAGGATTAGGATTAAGTGT  
GTCCGAGCAGTGTGGTTGTGCGAGGAAGAGATGAGGGGATCTTTGGTTAATAATACAGGAA  
GTCATCTGTAATGGGGGGAAAGGGGGGCCTGACC

**Additional File 1:** Consensus sequences for three distinct repeat units in the *P. Westermani* mitochondrial genome
